# Supplementary material for: Impact of faults on the remote stress state
Source: Copernicus journal article supplement (doi:10.5194/egusphere-2023-1829), 2023-08-16

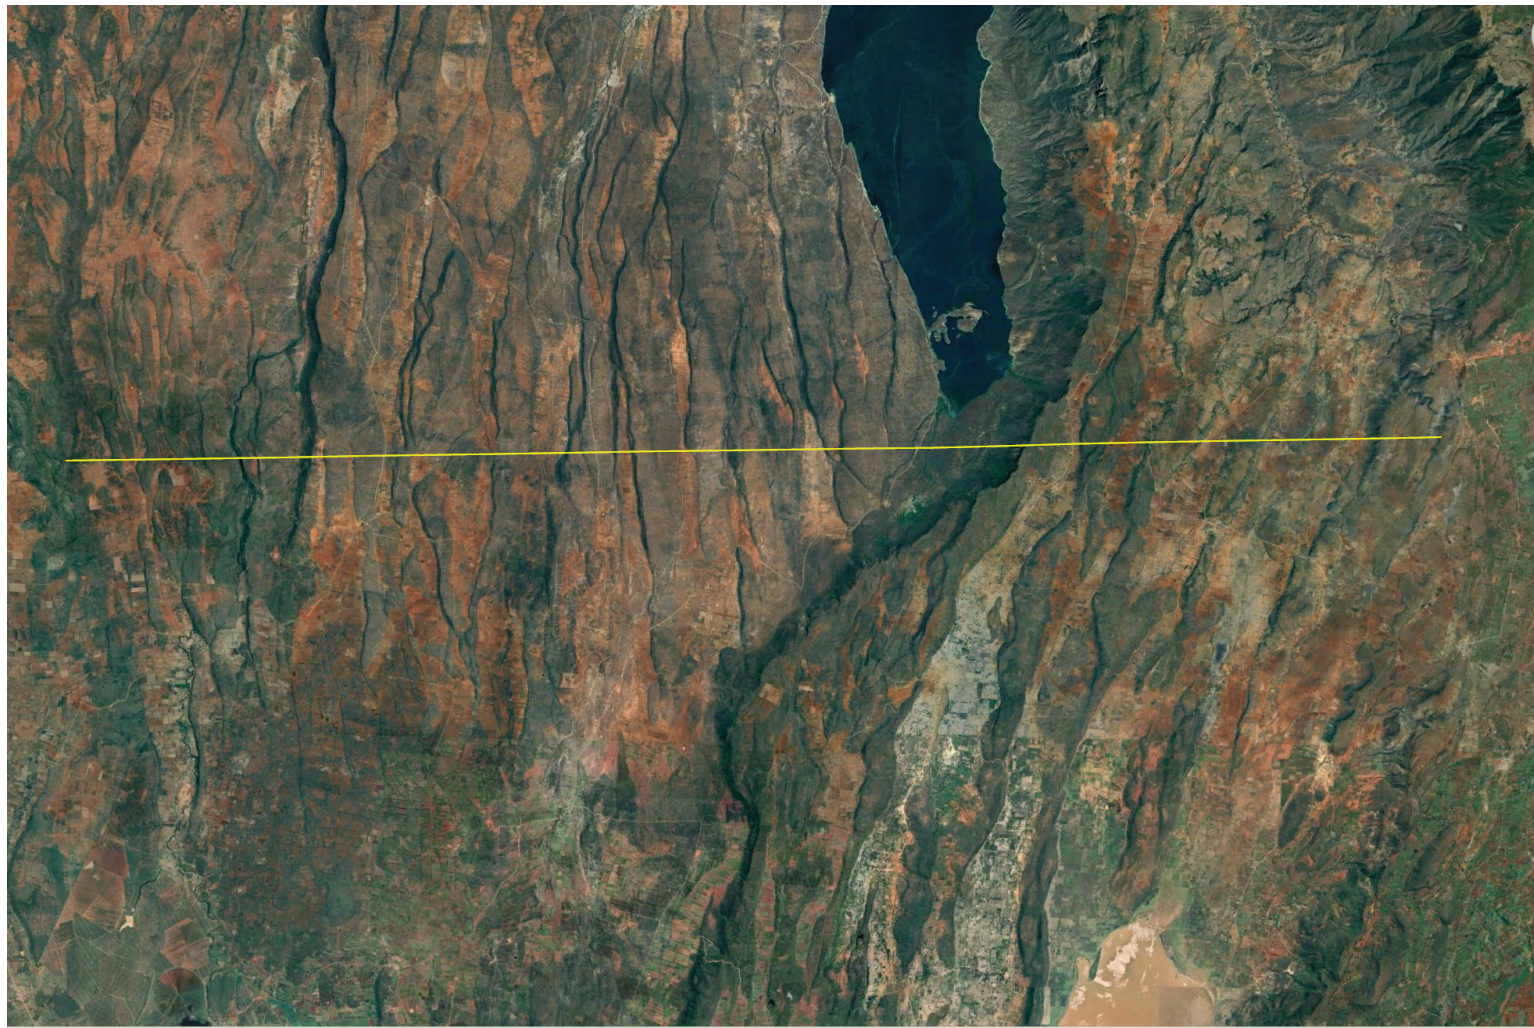

Supplement: Supplementary file [file egusphere-2023-1829-RC1-supplement.pdf]
